# Supplementary material for: An evaluation of different measures of dynamically recrystallized grain size for paleopiezometry or paleowattometry studies
Source: Copernicus journal article supplement (doi:10.5194/se-6-475-2015), 2015-05-07
Supplement: Supplementary file 1 [file se-6-475-2015-supplement-cover-letter.pdf › se-6-475-2015-supplement-cover-letter.pdf]

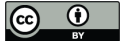

## *Supplement of*

# **An evaluation of different measures of dynamically recrystallized grain size for paleopiezometry or paleowattometry studies**

**M. A. Lopez-Sanchez and S. Llana-Fúnez**

*Correspondence to:* M. A. Lopez-Sanchez ([malopez@geol.uniovi.es](mailto:malopez@geol.uniovi.es))

- [se-6-475-2015-supplement-cover-letter.pdf](#)
- [DataSet01\\_sampleMAL05.txt](#)
- [DataSet02\\_sampleMAL05.txt](#)
- [DataSet03\\_sampleMAL05.txt](#)
- [DataSet04\\_sampleMAL05.txt](#)
- [GrainSizeTools\\_v0.2.py](#)
- [SourceCode\\_AnexoB.py](#)
- [SourceCode\\_AnexoC.py](#)
